# Supplementary material for: Antibiotic resistance and genomic features of Clostridioides difficile in southwest China
Source: PeerJ. 2022 Sep 5;10:e14016. doi: 10.7717/peerj.14016 (PMC9454788; doi:10.7717/peerj.14016)
Supplement: Supplemental Information 1 [file peerj-10-14016-s001.xlsx]

## Sheet: sheet1
Strains	agegroup	tcdA	tcdB	cdtA	cdtB	tcdC	tcdD	tcdE	ST	Clade	RT
YNCD100	child	positive	positive	negative	negative	positive	positive	positive	48	1	-
YNCD11	child	positive	positive	negative	negative	positive	positive	positive	54	1	12
YNCD120	child	positive	positive	negative	negative	positive	positive	positive	54	1	12
YNCD147	adult	positive	positive	negative	negative	positive	positive	positive	54	1	12
YNCD169	child	positive	positive	negative	negative	negative	positive	positive	26	1	140
YNCD17	child	positive	positive	negative	negative	positive	positive	positive	54	1	12
YNCD175	child	positive	positive	negative	negative	negative	positive	positive	39	4	85
YNCD19	child	positive	positive	negative	negative	positive	positive	positive	48	1	-
YNCD191	child	positive	positive	negative	negative	positive	positive	positive	35	1	46
YNCD219	adult	positive	positive	negative	negative	positive	positive	positive	35	1	46
YNCD222	child	positive	positive	negative	negative	positive	positive	negative	3	1	9
YNCD225	child	positive	positive	negative	negative	positive	positive	positive	26	1	140
YNCD228	child	positive	positive	negative	negative	positive	positive	positive	26	1	140
YNCD24	child	positive	positive	negative	negative	positive	positive	positive	3	1	1
YNCD263	child	positive	positive	negative	negative	positive	positive	positive	3	1	9
YNCD372	adult	negative	negative	negative	negative	negative	negative	negative	39	4	-
YNCD377	adult	positive	positive	negative	negative	positive	positive	positive	54	1	12
YNCD381	adult	positive	positive	negative	negative	positive	positive	positive	397	1	1
YNCD409	child	positive	positive	negative	negative	positive	positive	positive	35	1	46
YNCD478	adult	negative	negative	negative	negative	negative	negative	negative	3	1	9
YNCD489	adult	positive	positive	negative	negative	positive	positive	positive	208	-	46
YNCD5	child	negative	negative	negative	negative	negative	negative	negative	3	1	9
YNCD505	adult	positive	positive	negative	negative	positive	positive	positive	102	1	207
YNCD55	child	positive	positive	negative	negative	positive	positive	positive	8	1	46
YNCD585	adult	positive	positive	negative	negative	positive	positive	positive	2	1	220
YNCD590	child	positive	positive	negative	negative	positive	positive	positive	54	1	12
YNCD591	child	negative	negative	negative	negative	negative	negative	negative	3	1	9
YNCD6	child	positive	positive	negative	negative	positive	positive	positive	3	1	9
YNCD601	child	positive	positive	negative	negative	positive	positive	positive	3	1	1
YNCD695	child	negative	positive	negative	negative	negative	negative	negative	15	1	10
YNCD7	child	positive	positive	negative	negative	positive	positive	positive	35	1	46
YNCD721	child	positive	positive	negative	negative	positive	positive	positive	35	1	46
YNCD733	child	positive	positive	negative	negative	positive	positive	positive	399	1	12
YNCD745	child	positive	positive	negative	negative	positive	positive	positive	129	1	-
YNCD748	child	positive	positive	negative	negative	positive	positive	positive	129	1	-
YNCD751	child	positive	positive	negative	negative	positive	positive	positive	3	1	1
YNCD776	child	positive	positive	negative	negative	positive	positive	positive	3	1	1
YNCD82	child	positive	positive	negative	negative	positive	positive	positive	54	1	-
YNCD831	child	positive	positive	negative	negative	positive	positive	positive	3	1	1
YNCD86	child	positive	positive	negative	negative	positive	positive	positive	2	1	-
YNCD88	child	positive	positive	negative	negative	positive	positive	positive	2	1	-
YNCD887	child	negative	negative	negative	negative	negative	negative	negative	39	4	85
YNCD904	child	positive	positive	negative	negative	positive	positive	positive	35	1	46
YNCD905	child	positive	positive	negative	negative	positive	positive	positive	35	1	46
YNCD911	child	positive	positive	negative	negative	positive	positive	positive	3	1	1
YNCD916	child	positive	positive	negative	negative	positive	positive	positive	3	1	1
YNCD938	child	positive	positive	negative	negative	positive	positive	positive	35	1	46
YNCD944	child	positive	positive	negative	negative	positive	positive	positive	35	1	46
YNCD947	child	positive	positive	negative	negative	positive	positive	positive	35	1	46
