# Supplementary material for: Antibiotic resistance and genomic features of Clostridioides difficile in southwest China
Source: PeerJ. 2022 Sep 5;10:e14016. doi: 10.7717/peerj.14016 (PMC9454788; doi:10.7717/peerj.14016)
Supplement: Supplemental Information 2 [file peerj-10-14016-s002.xlsx]

## Sheet: Sheet1
Strains	GenBank accession	ST	RT	Source	year
CD21062	CP033216	11	78	China	2015
R20291	FN545816	1	27	UK	2006
2007855	FN665654	1	27	US	2007
08ACD0030	CP010888	2	-	-	-
ZJCDC-S82	JYNK01000000	5	-	China	2013
CD69	AVHE01000000	221	-	USA	2010
E14	CAMS01000000	2	-	France	-
CD37	AHJJ01000000	3	-	USA	1980
P15	AVLV01000000	8	-	USA	2005
5.3	AZSH01000000	15	-	Australia	2008
P30	AVME01000000	26	-	USA	2009
P29	AVMD01000000	35	-	USA	2008
CD22	AVGP01000000	48	-	USA	2010
CD630	CP010905	54	12	Switzerland	1982
T19	CANA01000000	55	-	France	-
E19	CAMO01000000	62	-	France	2012
P59	AVMQ01000000	123	-	USA	2009
M68	NC_017175	37	-	UK	2006
CF5	FN665652	86	-	Belgium	1995
M120	NC_017174	11	-	UK	2007
