# Supplementary material for: Antibiotic resistance and genomic features of Clostridioides difficile in southwest China
Source: PeerJ. 2022 Sep 5;10:e14016. doi: 10.7717/peerj.14016 (PMC9454788; doi:10.7717/peerj.14016)
Supplement: Supplemental Information 3 [file peerj-10-14016-s003.xlsx]

## Sheet: Sheet1
Strains	Effect reads (%)	ANI	Completeness (%)	Contamination (%)	Genome size (Kbp)	N50 (kbp)	GC (%)	coverage(%)	SNPs	Ins	Del
YNCD100	90.65	99.3725	98.44	1.59	4046.13	8.076	28.56	98.19	24341	179	208
YNCD11	92.91	99.8856	99.47	1.37	4208.02	17.213	28.91	98.61	11869	64	80
YNCD120	92.11	99.8797	98.46	1	4128.89	8.397	29.13	98.13	14270	74	79
YNCD147	91.54	99.8732	99.4	0.54	4136.9	7.352	29.15	98.19	16121	73	96
YNCD169	88.06	99.3613	99.39	0.71	4155.51	11.527	28.75	98.21	19798	162	185
YNCD17	93.24	99.8919	99.06	0.44	4187.64	13.945	28.94	98.38	12967	67	97
YNCD175	93.81	99.9224	99	0.59	4105	8.631	28.61	98.11	6336	77	77
YNCD19	92.47	99.4128	99.25	1.26	4114.15	13.834	28.43	98.66	24042	164	199
YNCD191	93.25	99.4248	98.92	0.73	4144.79	18.993	29.05	98.63	36394	234	266
YNCD219	93.1	99.3001	98.1	1.64	4057.77	6.493	29.27	97.51	28494	170	269
YNCD222	90.79	99.8277	97.4	1.3	3841.59	4.51	29.11	97.23	10474	128	126
YNCD225	94.09	99.4563	99.32	0.5	4190.64	10.783	28.79	98.24	21507	177	169
YNCD228	93.21	99.3793	99.47	0.71	4136.03	11.307	28.77	98.36	18693	152	168
YNCD24	93.33	99.7154	99.33	0.91	4176.86	10.406	28.44	98.86	8315	69	102
YNCD263	93.48	99.8125	99.15	0.91	4033.35	15.141	28.78	98.5	10746	161	142
YNCD372	92.31	99.9485	98.25	1.12	4037.96	9.855	28.64	98.41	3937	42	39
YNCD377	91.91	99.8572	98.5	1.18	4108.19	7.802	29.14	98.27	15587	62	85
YNCD381	88.27	99.7351	99.16	0.43	4146.62	19.783	28.32	98.64	6433	55	82
YNCD409	92.74	99.463	98.79	0.75	4083.68	14.751	29.06	98.52	33222	197	275
YNCD478	94.06	99.8303	98.42	0.73	3985.98	8.519	28.84	98.36	10095	158	126
YNCD489	90.65	99.3033	97.78	0.62	4125.52	7.281	29.19	97.24	29550	180	256
YNCD5	91.57	99.7974	98.73	1.57	3960.2	7.901	28.76	98.48	9692	174	130
YNCD505	92.98	99.7493	99.36	0.46	4130.48	12	28.46	98.55	14823	115	164
YNCD55	91.33	99.9447	99.46	0.53	3977.2	27.448	28.22	98.92	3868	45	48
YNCD585	92.86	99.8506	98.44	0.92	4191.16	10.784	28.48	98.8	10637	66	91
YNCD590	90.1	99.8547	98.97	0.82	4097	8.03	29.1	98.2	14973	78	97
YNCD591	87.59	99.8128	98.79	0.73	4024.34	10.139	28.87	98.1	11282	160	163
YNCD6	89.9	99.8051	97.18	1.08	3914.95	5.541	29.02	96.82	10727	150	133
YNCD601	88.31	99.7876	95.23	1.84	3941.95	3.817	29.12	96.69	6217	41	74
YNCD695	90.91	99.8658	99.27	1.45	4147.45	8.41	28.64	98.1	10616	68	62
YNCD7	85.8	99.4039	98.83	1.04	4159.76	17.638	28.99	98.02	34249	210	272
YNCD721	91.08	99.3347	99.15	0.38	4157.98	21.685	28.98	98.1	28909	211	253
YNCD733	89.47	99.8479	98.46	1.08	4146.98	6.775	29.17	98.39	14213	68	89
YNCD745	91.04	99.5174	95.47	1.6	3801.48	3.702	29.3	96.84	25097	116	196
YNCD748	88.46	99.4115	99.21	0.38	4106.84	20.209	28.73	98.52	24681	178	230
YNCD751	91.56	99.8704	99.24	0.72	4044.56	12.668	28.59	98.66	13548	70	108
YNCD776	89.16	99.9181	99.51	0.7	4009.64	19.049	28.39	98.73	4077	42	65
YNCD82	93.55	99.866	99.44	0.66	4209.55	12.082	29.11	98.55	13814	58	76
YNCD831	90.11	99.859	98.53	1.23	3898.35	5.405	28.87	97.98	11852	69	110
YNCD86	92	99.7397	99.24	0.58	4062.46	9.373	28.56	98.6	13642	89	111
YNCD88	92.19	99.9224	98.94	0.96	4092.76	11.81	28.63	98.52	9557	74	65
YNCD887	87.5	99.9577	99.13	0.62	4002.48	20.87	28.52	98.49	3023	31	46
YNCD904	92.08	99.4601	98.79	1.6	4068.32	7.945	29.19	98.26	33136	175	244
YNCD905	91.01	99.3962	97.2	1.52	3959.83	4.792	29.42	97.7	34632	160	261
YNCD911	89.19	99.9302	98.21	0.95	4034.78	8.855	28.83	98.16	5259	41	78
YNCD916	91.52	99.8885	94.34	2.08	3766.98	3.439	29.34	96.74	5647	49	60
YNCD938	93.1	99.3269	96.47	1.16	3984.07	5.028	29.37	97.02	28461	165	242
YNCD944	93.55	99.3602	99.02	1.12	4117.28	11.827	29.05	97.53	28492	203	248
YNCD947	93.65	99.2824	97.18	1.02	4043.1	6.302	29.22	97.25	28311	167	233
